# Supplementary material for: Shorter Antibacterial Peptide Having High Selectivity for E. coli Membranes and Low Potential for Inducing Resistance
Source: MDPI journal article supplement (doi:10.3390/microorganisms8060867), 2020-06-08
Supplement: s1 [file s1]

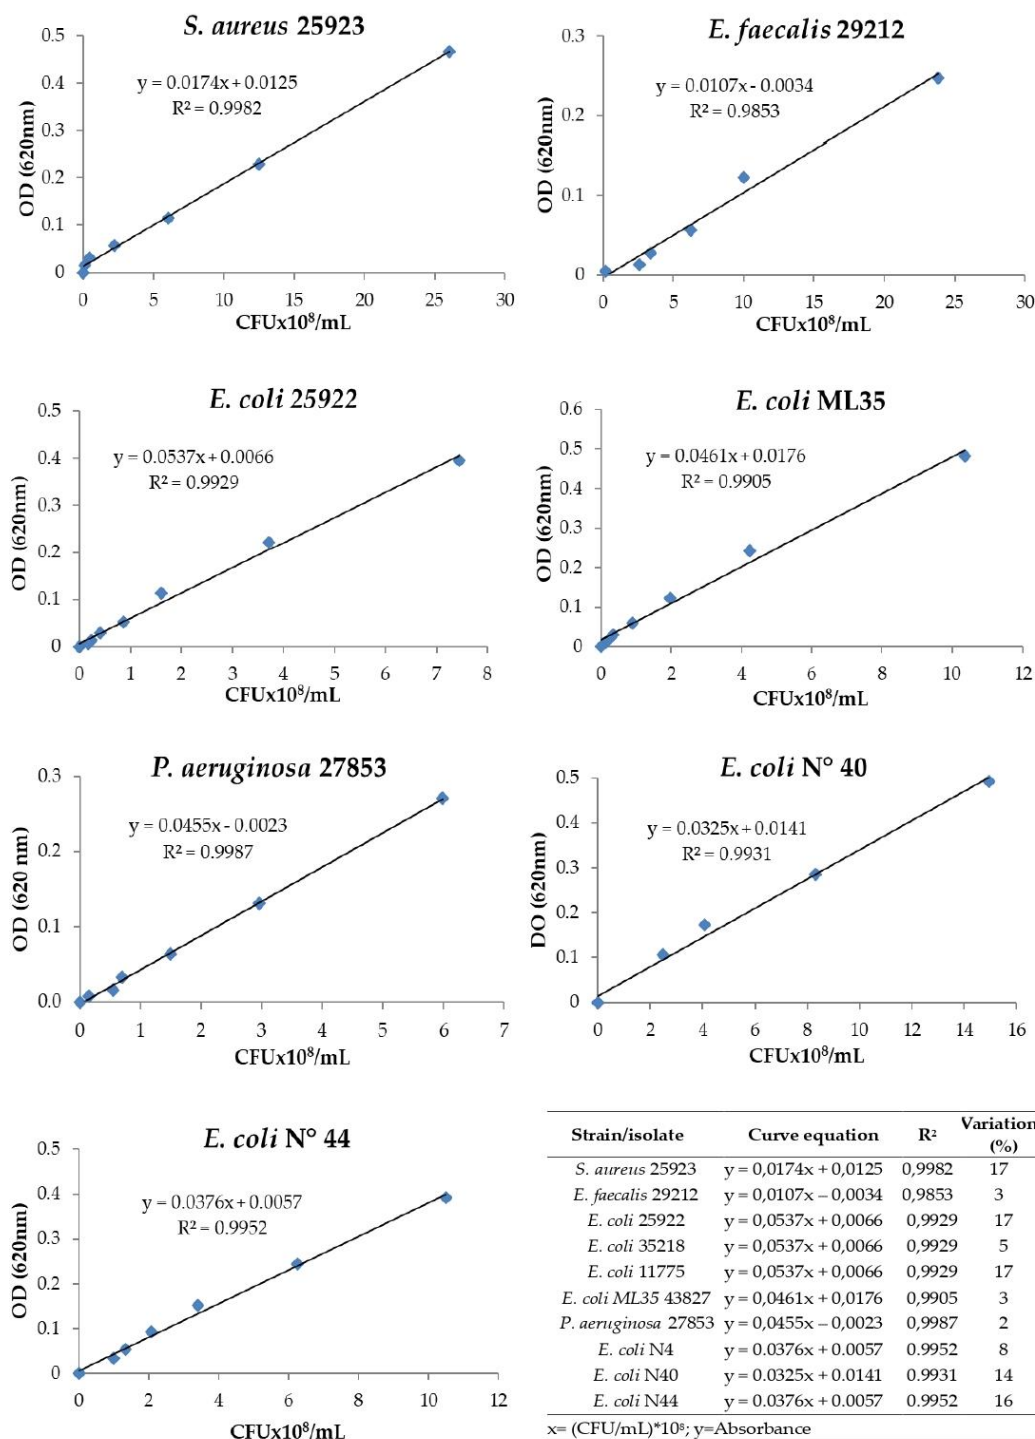

**Figure S1:** Calibration curves used with the bacterial strains in this study and their percentage variation. Some curves were used for more than one bacterial strain, as can be seen on this figure's inset. The OD was measured in 270  $\mu$ L volume.

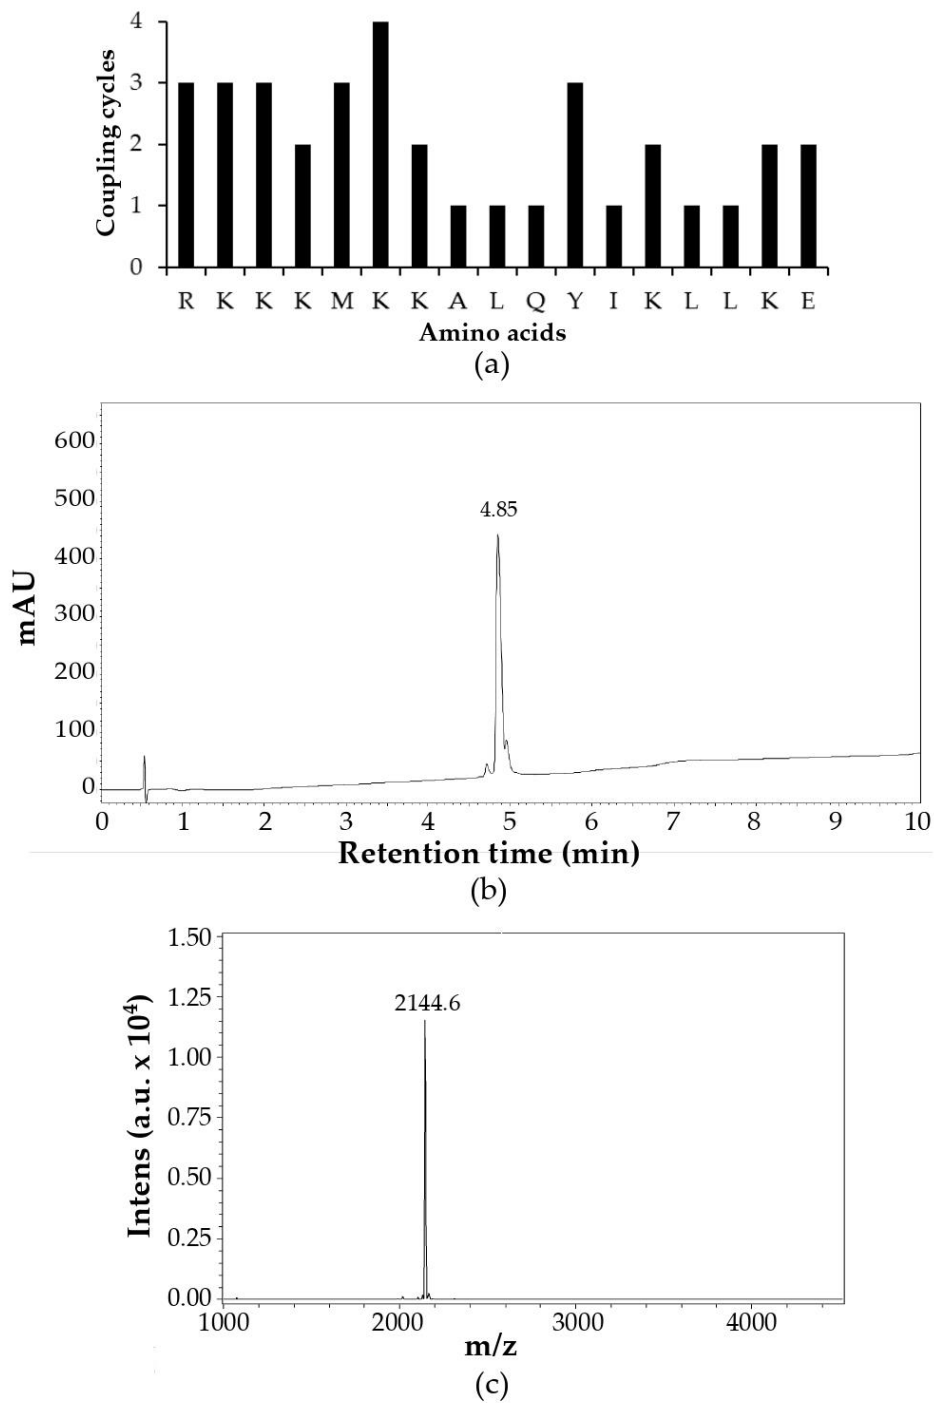

**Figure S2:** Data regarding the synthesis, purification and characterisation of the most representative peptide from this study (peptide 35409-1). A. Summary of synthesis from the C-terminal extreme to the N-terminal extreme. B. Pure peptide chromatographic profile (HPLC). C. MALDI-TOF mass spectra, the observed signal at 2144.6 corresponds to the  $[M + H]^+$  specie.

**Table S1.** RP-HPLC chromatographic characterisation of 35409 derived-peptides

| Peptide  | Sequence             | Length | Purity <sup>a</sup> (%)<br>RP-HPLC |
|----------|----------------------|--------|------------------------------------|
| 35409    | RYRRKKKMKKALQYIKLLKE | 20     | 96                                 |
| 35409-1  | RKKKMKKALQYIKLLKE    | 17     | 86-95                              |
| 35409-2  | KKKMKKALQYIKLLKE     | 16     | 74                                 |
| 35409-3  | KKMKKALQYIKLLKE      | 15     | 90                                 |
| 35409-4  | KMKKALQYIKLLKE       | 14     | 71                                 |
| 35409-5  | MKKALQYIKLLKE        | 13     | 98                                 |
| 35409-6  | ALQYIKLLKE           | 10     | 99                                 |
| 35409-7  | YIKLLKE              | 7      | 98                                 |
| 35409-8  | RYRRKKKMKKALQYIKL    | 17     | 100                                |
| 35409-9  | RYRRKKKMKKALQY       | 14     | 98                                 |
| 35409-10 | RYRRKKKMKKA          | 11     | 97                                 |
| 35409-11 | RYRRKKKMKK           | 10     | 97                                 |
| 35409-12 | RYRRKKK              | 7      | 90                                 |
| 35409-13 | KKMKKALQYIKLLK       | 14     | 99                                 |
| 35409-14 | KKMKKALQYIKL         | 12     | 97                                 |
| 35409-15 | RKKKMKKALQY          | 11     | 98                                 |
| 35409-16 | KMKKALQY             | 8      | 98                                 |

<sup>a</sup> Purity according to the percentage of the area below the chromatographic curve regarding the whole chromatogram. Two batches involving different synthesis, purification and characterisation processes were used for 35409-1 peptide, one having 86% chromatographic purity and the other 95%. No change in MIC results was observed between batches of the peptide.
